# Supplementary material for: Correlation of the Aryl Hydrocarbon Receptor with FSHR in Ovarian Cancer Patients
Source: MDPI journal article supplement (doi:10.3390/ijms20122862), 2019-06-12
Supplement: s1 [file s1]

Supplementary Materials:

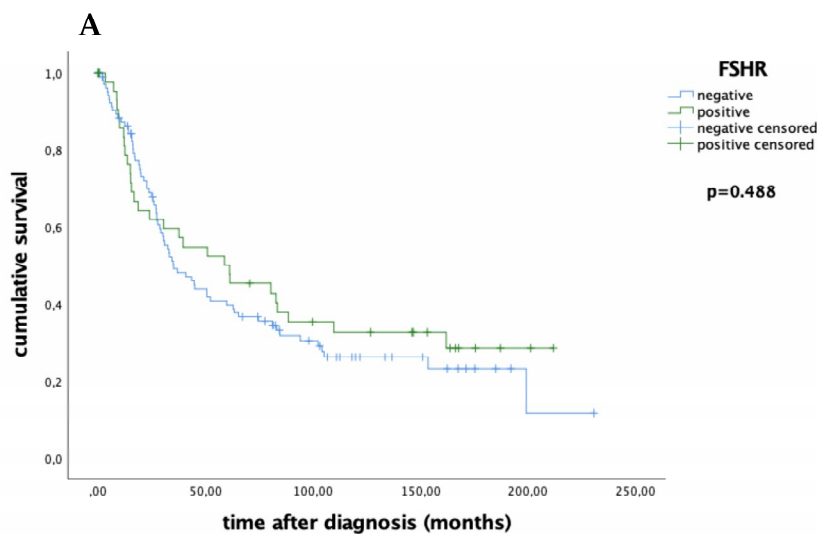

**Figure 1:** Kaplan-Meier curve: survival of patients with negative vs. positive FSHR expression. There is no significant difference in survival between the two groups ( $p=0.488$ ).

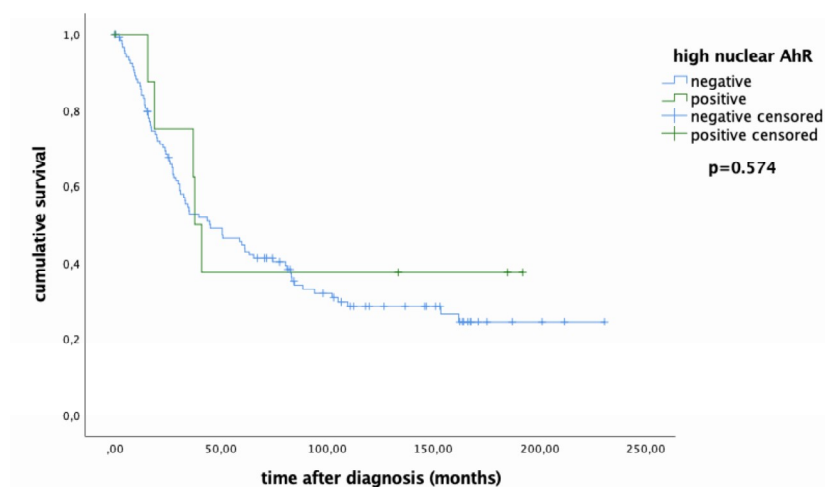

**Figure 2:** Kaplan-Meier curve: survival of patients with high nuclear AhR staining. There is no significant difference in survival between high and low nuclear intensity ( $p=0.574$ ).
